# Supplementary material for: Accuracy of Breast Ultrasonography and Mammography in Comparison with Postoperative Histopathology in Breast Cancer Patients after Neoadjuvant Chemotherapy
Source: MDPI journal article supplement (doi:10.3390/diagnostics13172811), 2023-08-30

## Supplementary Material

Title: Accuracy of breast ultrasonography and mammography in comparison with postoperative histopathology in breast cancer patients after neoadjuvant chemotherapy

**Supplementary Table S1.** Chemotherapeutic treatment for the tumors included in the study. Data of all tumor cases included.

| Chemotherapeutic medication                     | Frequency (%) |
|-------------------------------------------------|---------------|
| Epi/nabPacli/Cyclo (similar to ETC)             | 2 (1.0%)      |
| Epi/Cyclo                                       | 3 (1.6%)      |
| Epi/Cyclo /Doc/Beva                             | 3 (1.6%)      |
| Epi/Cyclo/Pacli/Carbo                           | 11 (5.7%)     |
| Epi/Cyclo/Doc                                   | 42 (21.8%)    |
| Epi/Cyclo/Doc/Pacli                             | 2 (1.0%)      |
| Epi/Cyclo/nabPacli                              | 8 (4.1%)      |
| Epi/Cyclo/Pacli                                 | 30 (15.5%)    |
| Epi/Cyclo/Pacli/Beva                            | 1 (0.5%)      |
| ETC                                             | 20 (10.4%)    |
| LipDoxo/Pacli/Carbo                             | 3 (1.6%)      |
| Pacli                                           | 1 (0.5%)      |
| Pacli/Beva                                      | 1 (0.5%)      |
| Pacli/Carbo                                     | 1 (0.5%)      |
| Doxo/Pacli/Carbo                                | 2 (1.0%)      |
| TAC                                             | 11 (5.7%)     |
| <b>Combinations with anti-Her2neu therapies</b> |               |
| Doxo/Pacli/Carbo/Trastuzumab, Pertuzumab        | 1 (0.5%)      |
| ETC/Trastuzumab, Pertuzumab                     | 5 (2.6%)      |
| Epi/Cyclo/Doc/Trastuzumab, Pertuzumab           | 2 (1.0%)      |
| Epi/Cyclo/Doc/Lapatinib                         | 1 (0.5%)      |
| Epi/Cyclo/Doc/Trastuzumab                       | 8 (4.1%)      |
| Epi/Cyclo/nabPacli/Trastuzumab, Pertuzumab      | 1 (0.5%)      |
| Epi/Cyclo/Pacli/Trastuzumab, Pertuzumab         | 20 (10.4%)    |
| Epi/Cyclo/Pacli/Trastuzumab                     | 6 (3.1%)      |
| ETC/Trastuzumab                                 | 2 (1.0%)      |
| Pacli/Trastuzumab, Pertuzumab                   | 2 (1.0%)      |
| LipDoxo/Pacli/Trastuzumab, Pertuzumab           | 1 (0.5%)      |
| TCH                                             | 1 (0.5%)      |
| TCHP                                            | 2 (1.0%)      |

Beva: Bevacizumab, Carbo: Carboplatin, Cyclo: Cyclophosphamide, Doc: Docetaxel, Dox: Doxorubicin, Epi: Epirubicin, ETC: Epirubicin, Paclitaxel, Cyclophosphamid (Intense Dose-Dense Sequential Chemotherapy), LipDoxo: Liposomales Doxorubicin, nabPacli: nab-Paclitaxel, Pacli: Paclitaxel, TAC: Docetaxel, Adriamycin, Cyclophosphamide, TCH: Paclitaxel, Carboplatin, Trastuzumab, TCHP: Paclitaxel, Carboplatin, Trastuzumab, Pertuzumab

**Supplementary Table S2.** Summary statistics of preoperative ultrasound and mammography classification according to Breast Imaging Reporting & Data System (BI-RADS®) along with ypT stadium, the grade of neoadjuvant histological regression as well as the molecular subtype of each tumor case determined by means of immunohistochemistry. ypT = pathological T value (tumor diameter) of the postsurgical TNM stadium.

| Variable                     | Frequency (%) |
|------------------------------|---------------|
| BIRADS Sonography            |               |
| 2                            | 1 (0.5%)      |
| 3                            | 1 (0.5%)      |
| 4 <sup>1</sup>               | 41 (21.2%)    |
| 4a                           | 3 (1.6%)      |
| 4b                           | 3 (1.6%)      |
| 4c                           | 11 (5.7%)     |
| 5                            | 85 (44%)      |
| 6                            | 47 (24.4%)    |
| Missing                      | 1 (0.5%)      |
| BIRAS Mammography            |               |
| 1                            | 2 (1.0%)      |
| 2                            | 9 (4.7%)      |
| 3                            | 6 (3.1%)      |
| 4 <sup>1</sup>               | 30 (15.5%)    |
| 4a                           | 5 (2.6%)      |
| 4b                           | 3 (1.6%)      |
| 4c                           | 6 (3.1%)      |
| 5                            | 94 (48.7%)    |
| 6                            | 33 (17.1%)    |
| Missing                      | 5 (2.6%)      |
| ypT-Stadium                  |               |
| 0                            | 107 (55.4%)   |
| Tis                          | 6 (3.1%)      |
| 1                            | 60 (31.1%)    |
| 2                            | 15 (7.8%)     |
| 3                            | 2 (1.0%)      |
| 4                            | 3 (1.6%)      |
| Regression grade (nach Sinn) |               |
| 0                            | 3 (1.6%)      |
| 1                            | 43 (22.3%)    |
| 2                            | 30 (15.5%)    |
| 3                            | 6 (3.1%)      |
| 4                            | 107 (55.4%)   |
| Missing/unclear              | 4 (2.1%)      |
| Biological subtype           |               |
| Luminal A                    | 19 (9.8%)     |
| Luminal B                    | 42 (21.8%)    |
| Her2-like                    | 65 (33.7%)    |
| Triple negative              | 67 (34.7%)    |

<sup>1</sup>provided only when further classification in 4a-c was not possible.

**Supplementary Table S3** . Distribution of pathologic complete response (pCR) and ypT-Stage among different molecular types of breast cancers included in the study. Significant differences based on the chi-squared test can be seen ( $p < 0.001$ ),

| ypT      | Luminal A  | Luminal B  | Her2-like  | Triple negative |
|----------|------------|------------|------------|-----------------|
| 0        | 6 (31.6%)  | 16 (38.1%) | 46 (70.8%) | 39 (58.2%)      |
| Tis      | 0          | 1 (2.4%)   | 5 (7.7%)   | 0               |
| $\geq 1$ | 13 (68.4%) | 25 (59.5%) | 14 (21.5%) | 28 (41.8%)      |

**Supplementary Figure S1.** Alluvial plot demonstrated the change of cT to ypT-Stage after chemotherapy. Stages correspond to the TNM classification.

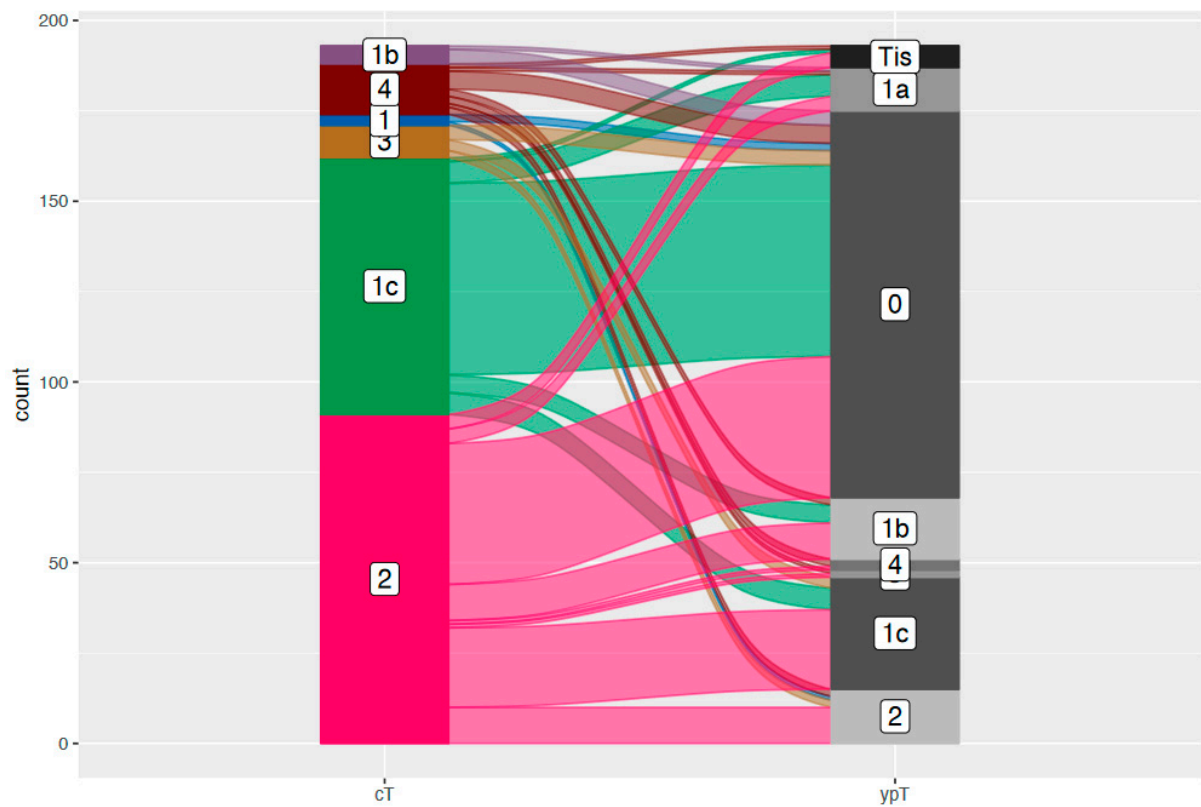

Supplement: s1 [file s1]
